# Supplementary material for: Photoacoustic microscopy reveals the hemodynamic basis of sphingosine 1-phosphate-induced neuroprotection against ischemic stroke
Source: PubMed Central journal article supplement — Theranostics. 2018 Nov 29;8(22):6111–20. doi: 10.7150/thno.29435 (PMC6299683; doi:10.7150/thno.29435), 2018-11-29
Supplement: thnov08p6111s1.pdf [file thnov08p6111s1.pdf]

Supplementary Material For

**Photoacoustic microscopy reveals the hemodynamic basis of sphingosine 1-phosphate-induced neuroprotection against ischemic stroke**

Rui Cao<sup>1</sup>, Jun Li<sup>2</sup>, Yuges Kharel<sup>3</sup>, Chenchu Zhang<sup>1</sup>, Emily Morris<sup>4</sup>, Webster L. Santos<sup>4</sup>, Kevin R. Lynch<sup>3,\*</sup>, Zhiyi Zuo<sup>2,\*</sup>, and Song Hu<sup>1,\*</sup>

<sup>1</sup>Department of Biomedical Engineering, University of Virginia, Charlottesville, USA

<sup>3</sup>Department of Anesthesiology, University of Virginia, Charlottesville, USA

<sup>2</sup>Department of Pharmacology, University of Virginia, Charlottesville, USA

<sup>4</sup>Department of Chemistry and VT Center for Drug Discovery, Virginia Tech, Blacksburg, USA

\*Corresponding authors: Kevin R. Lynch ([kr12z@virginia.edu](mailto:kr12z@virginia.edu)), Zhiyi Zuo ([zz3c@virginia.edu](mailto:zz3c@virginia.edu)), and Song Hu ([songhu@virginia.edu](mailto:songhu@virginia.edu))

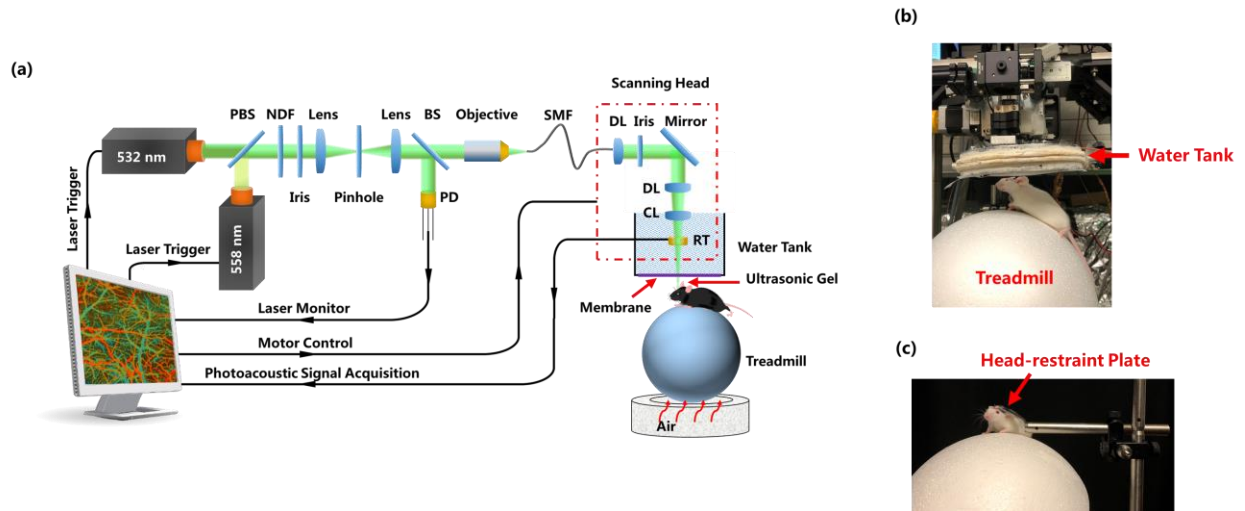

**Figure S1.** (a) Schematic of the head-restrained multi-parametric photoacoustic microscopy. PBS, polarizing beam splitter; NDF, neutral-density filter; BS, beam sampler; PD, photodiode; SMF, single-mode fiber; DL, doublets; CL, correction lens; RT, ring transducer. (b), (c) Photos of a head-restrained mouse.

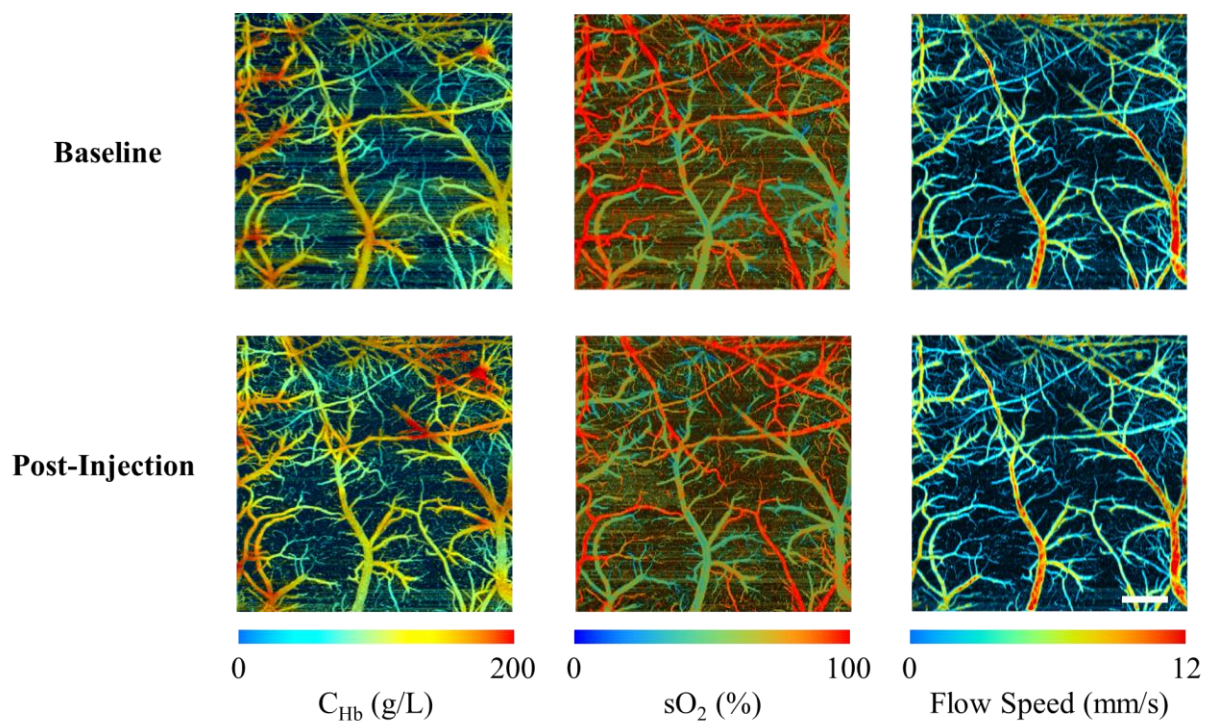

**Figure S2.** Images of  $C_{Hb}$ ,  $sO_2$  and blood flow speed in the awake mouse brain acquired before and after the injection of “active” compound SLM6031434 under normoxia. Scale bar, 500  $\mu$ m.
